# Supplementary material for: Stereo-electronic effect of the perfluoropropyl group on the solid-state molecular packing of isomeric dibenzo[a,c]phenazine derivatives
Source: Royal Society of Chemistry journal article supplement (doi:10.1039/d2ce00019a), 2022-01-01
Supplement: d2ce00019a1.pdf [file d2ce00019a1.pdf]

Electronic Supporting Information (ESI)

**Stereo-electronic effect of perfluoropropyl group on solid state molecular packing of isomeric dibenzo [a,c]phenazine derivatives**

Anjaneyulu Putta, Shankar Gairhe, Yao Feng and Haoran Sun\*

Department of Chemistry and Center for Fluorinated Functional Materials, University of South Dakota, Vermillion, South Dakota, United States, 57069

Email: [Haoran.Sun@usd.edu](mailto:Haoran.Sun@usd.edu)

Table of contents

1. Synthesis of compound 1 and 3
2. <sup>1</sup>H NMR, <sup>19</sup>F NMR and Mass spectra for compounds 1 and 3
3. Crystal structure analysis
4. Computational work: XYZ coordinates and total energies of compounds 1,2 and 3

## 1. Synthesis of compound 1 and 3.

### Compound 1:

A mixture of 10,13-dibromo-dibenzo[a,c] phenazine (0.125 g, 0.28 mmol), Cu powder (0.178 g, 2.8 mmol) DMSO (1 mL), HFE-7200 (1 mL) were added to pressure tube. To this, n-perfluoropropyl iodide (0.42 g, 1.42 mmol) was added and the reaction was heated to 130 °C and continued at this temperature with stirring for 24 hours. The reaction tube was cooled to room temperature, slowly release the pressure. Dichloromethane (2 x 30 mL) was added, sonicated for 15 minutes to dissolve the product and filtered the mixture. The filtrate was extracted with dichloromethane (30 mL), deionized water (3 x 30 mL) to remove any residual DMSO. Organic layer was dried over Na<sub>2</sub>SO<sub>4</sub>, filtered and rotovapored to get crude product. Crude product was subjected to column chromatography with eluent hexane: chloroform in 3 : 1 ratio to get yellow powder. Yellow powder was recrystallized with chloroform to get pure yellow crystalline material in a yield of 94 mg (54%) with mp 246-250 °C. Compound **1** was characterized by <sup>1</sup>H NMR (400 MHz, CDCl<sub>3</sub>): δ 9.32 (dd, J = 7.9, 1.3 Hz, 2H), 8.60 (d, J = 8.1 Hz, 2H), 8.28 (s, 2H), 7.89 (m, 2H), 7.82 (m, 2H); <sup>19</sup>F NMR (376 MHz, CDCl<sub>3</sub>): δ -80.04 (t, J = 9.5 Hz, 6F), -105.88 (m, 4F), -123.50 (m, 4F); EI-MS : m/z (m<sup>+</sup>) 616.0 (calcd for C<sub>26</sub>H<sub>10</sub>F<sub>14</sub>N<sub>2</sub> : 616.36).

**Compound 3:** Compound 3 was prepared in three steps.

**Step1:** 3,6-dibromophenanthrene-9,10-di(ethyleneglycol)ketal (1 g, 2.2 mmol) was transferred to an oven-dried pressure tube with a magnetic spin bar. Copper powder (1.4 g, 22 mmol), HFE-7200 (7 mL) and DMSO (7 mL) were then added to it followed by heptaperfluoro-iodopropane (3.2 g, 11 mmol). The reaction was carried out at 135 °C for 20 hours. After completion of reaction, the pressure tube was left for cooling down to room temperature and the pressure was slowly released.

30 mL dichloromethane was added to the pressure tube and sonicated for 5 minutes to dissolve the target product. It was then filtered through small silica pad. The filtrate was extracted with dichloromethane (50 mL) and water ( $2 \times 200$  mL) to remove the residual DMSO. The organic phase was dried over anhydrous sodium sulfate and filtered to get crude compound (b) in 89% yield. This crude product was characterized by  $^1\text{H}$  and  $^{19}\text{F}$  NMR and used for next step without further purification.  $^1\text{H}$  NMR ( $\text{CDCl}_3$ , 400 MHz)  $\delta$  (ppm) 8.08 (s, 2H), 7.97 (d,  $J_1 = 8.28$  Hz, 2H), 7.72 (d,  $J_1 = 8.28$  Hz, 2H), 4.28 (bs, 4H), 3.68 (bs, 4H);  $^{19}\text{F}$  NMR (376 MHz,  $\text{CDCl}_3$ );  $\delta$  -79.83 (t,  $J = 9.58$  Hz, 6F), -111.88 (m, 4F), -125.92 (m, 4F).

**Step2:** The crude product from step 1 (2.5 g, 3.95 mmol) was transferred to an oven dried 500 mL round bottom flask with a magnetic spin bar. Dichloromethane (150 mL) was added to the flask followed by 25 mL of concentrated perchloric acid. The reaction mixture was stirred at  $0^\circ\text{C}$  for 5 hours and then at room temperature overnight. After completion of the reaction, the resulting yellow colored reaction mixture was carefully transferred to a separatory funnel containing 200 mL of distilled water. The target compound was then extracted with dichloromethane (20 mL). The organic phase was dried over anhydrous sodium sulfate and filtered. The solvent was evaporated until some turbidity of the product was observed. It was then directly transferred to refrigerator for cooling which cause the precipitation of compound in the form of yellow crystalline material. This yellow crystalline material was then transferred to vacuum filter to remove residual solution. Recrystallization from dichloromethane afforded yellow crystals of 3,6-bis(perfluoropropyl)phenanthrene-9,10-dione in a yield of 2.0 g (92%) with melting point of  $135\text{--}137^\circ\text{C}$ .  $^1\text{H}$  NMR (400 Hz,  $\text{CDCl}_3$ )  $\delta$  (ppm) 8.42 (d,  $J = 8.26$  Hz, 2H), 8.23 (s, 2H), 7.81 (d,  $J = 8.26$  Hz, 2H);  $^{19}\text{F}$  NMR (376 MHz,  $\text{CDCl}_3$ );  $\delta$  -79.74 (t,  $J = 9.60$  Hz, 6F), -112.71 (m, 4F), -125.80 (m, 4F).ESI-MS;  $m/z$  ( $m^+$ ) 544.0 (Calculated for  $\text{C}_{20}\text{H}_6\text{F}_{14}\text{O}_2$ : 544.23).

**Step3:** 3,6-bis(perfluoropropyl)phenanthrene-9,10-dione (0.1257 g, 0.23 mmol) and 1,2-phenylenediamine (0.027 g, 0.25 mmol) was transferred to an oven dried 50 mL round bottom flask with a magnetic spin bar. Glacial acetic acid (12 mL) and ethanol mixture in (1:3) ratio was added to it and the reaction was carried out at 35 °C for 10 hours. After completion of the reaction, reaction mixture was filtered through a plastic funnel to recover yellowish white solid target product. The crude product was thoroughly washed with water to remove residual acetic acid and then with 15 mL of methanol. Recrystallization from dichloromethane afforded compound 3 as yellowish white crystalline material in yield of 0.135 g (95%) with melting point 184-186 °C. <sup>1</sup>H NMR (400 Hz, CDCl<sub>3</sub>) δ (ppm) 9.63 (d, J = 8.50 Hz, 2H), 8.77 (s, 2H), 8.41 (m, 2H), 8.02 (d, J = 8.50 Hz, 2H), 7.98 (m, 2H); <sup>19</sup>F NMR (376 Hz, CDCl<sub>3</sub>) δ -79.76 (t, J = 9.50 Hz, 6F), -111.52 (m, 4F), -125.85 (m, 4F); FTMS (p ESI sim MS); m/z (M+H)<sup>+</sup> 617.0679.(cald for C<sub>26</sub>H<sub>11</sub>F<sub>14</sub>N<sub>2</sub>: 617.0698).

# 1. <sup>1</sup>H NMR, <sup>19</sup>F NMR and Mass spectra for compounds 1 and 3

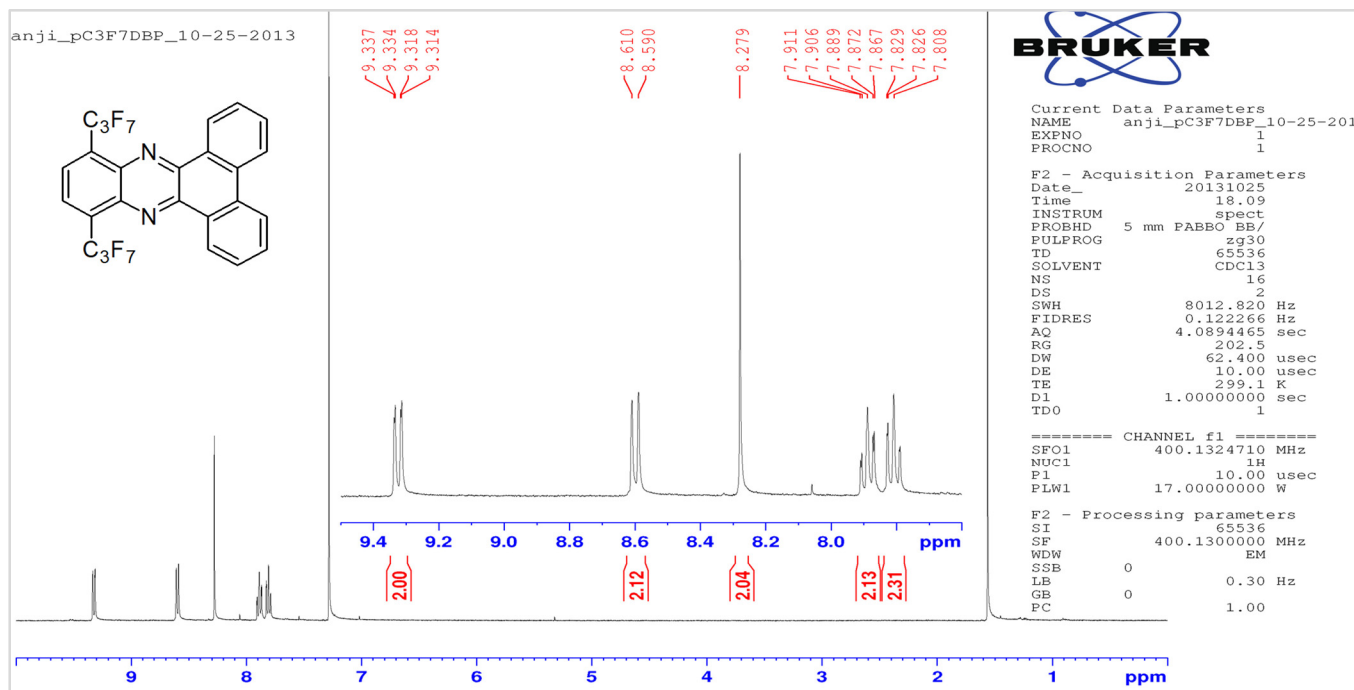

Figure S1: <sup>1</sup>H NMR (400 MHz, CDCl<sub>3</sub>) spectrum of compound 1.

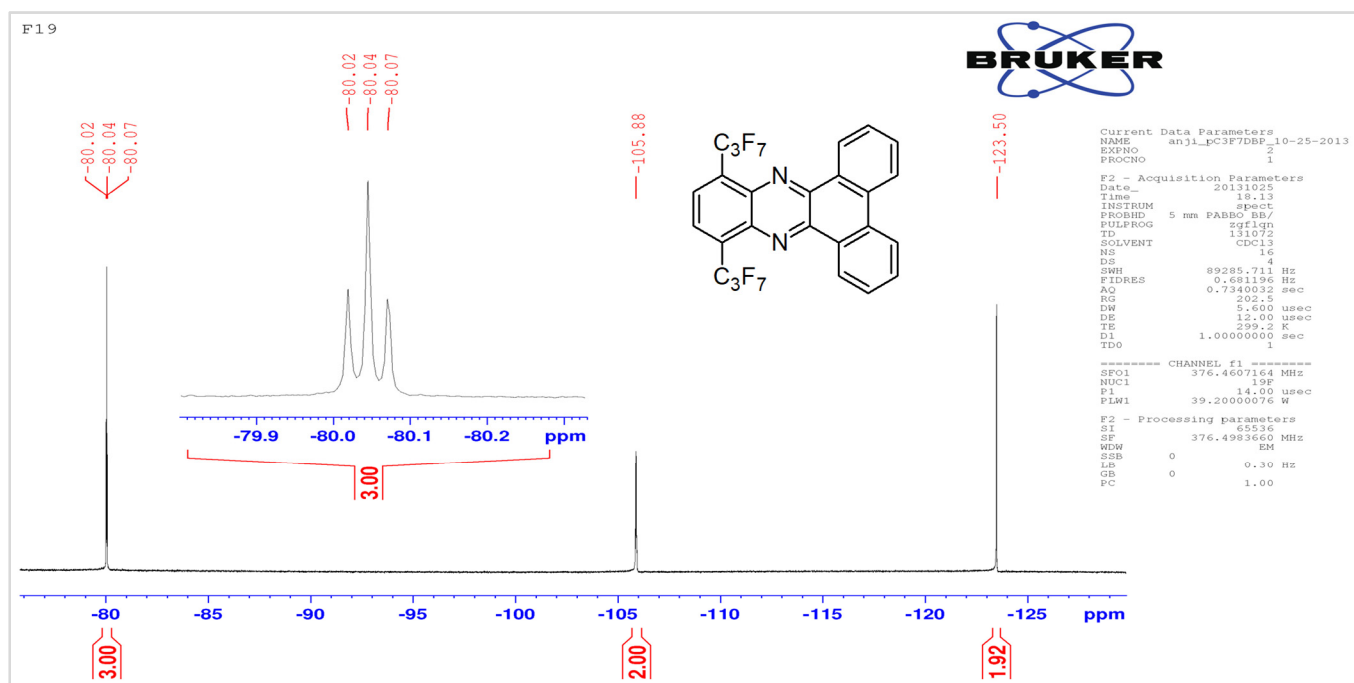

Figure S2: <sup>19</sup>F NMR (376 MHz, CDCl<sub>3</sub>) spectrum of compound 1.

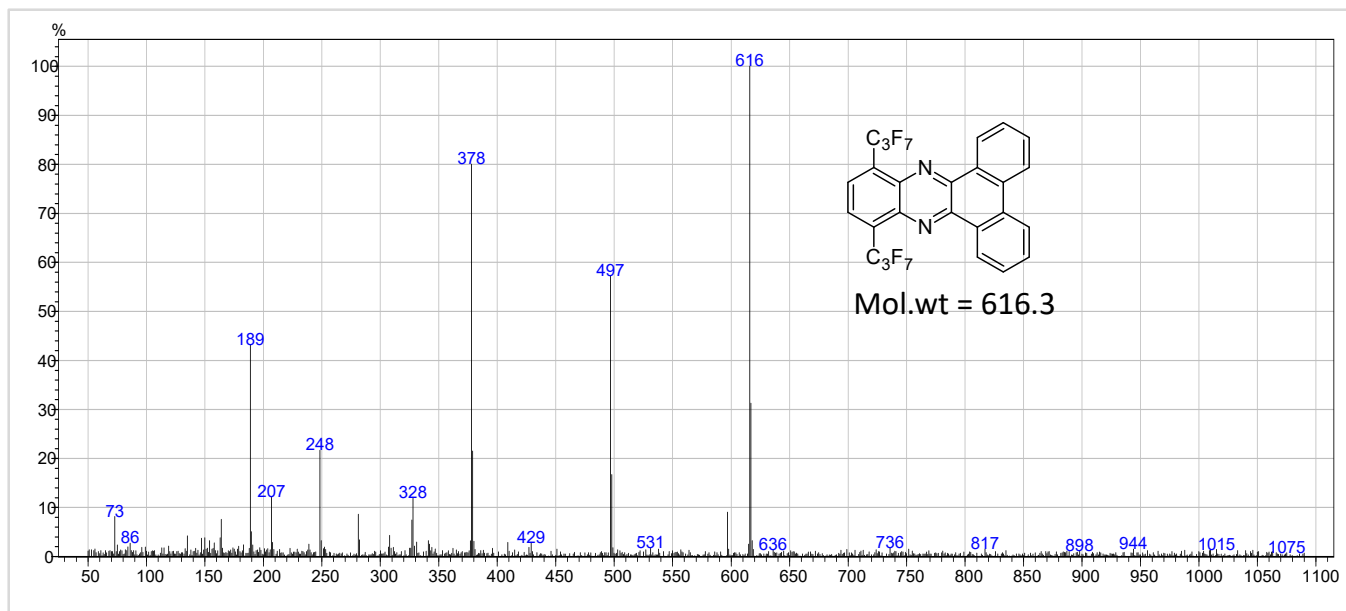

Figure S3: EI-MS spectrum of compound 1.

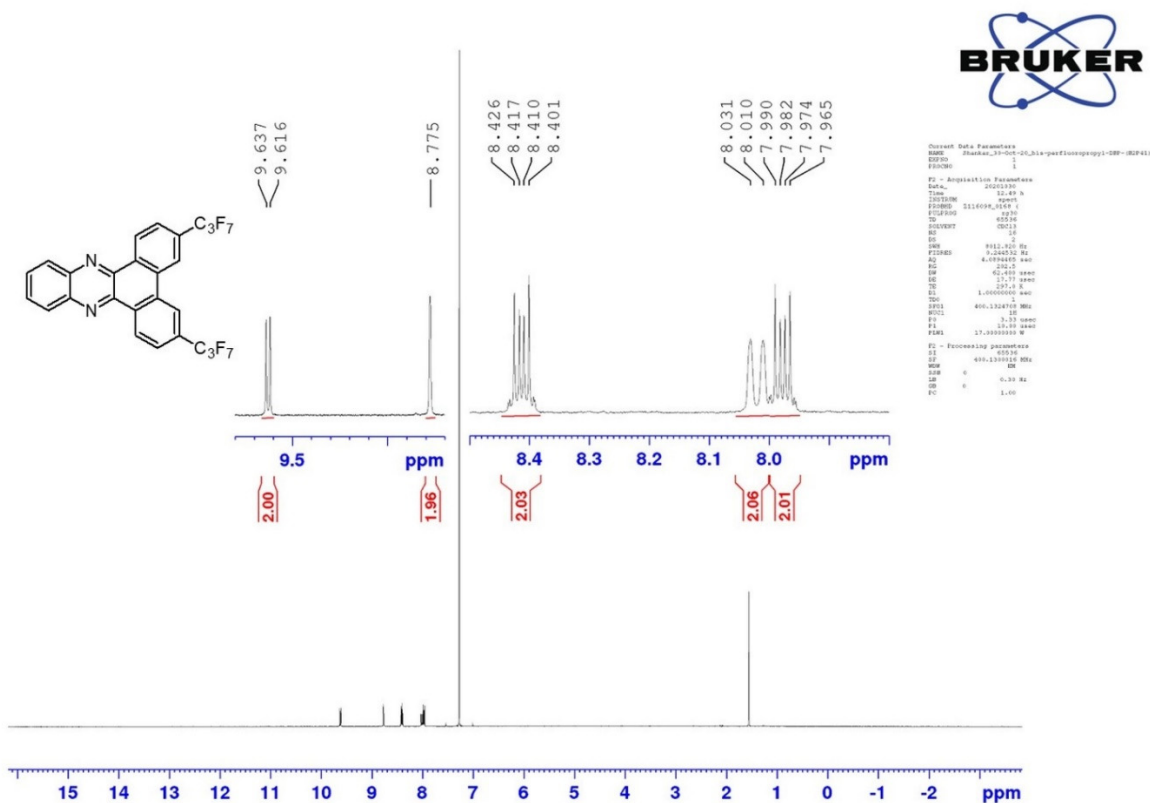

Figure S4:  $^1\text{H}$  NMR (400 MHz,  $\text{CDCl}_3$ ) spectrum of compound 3.

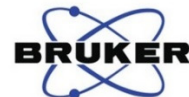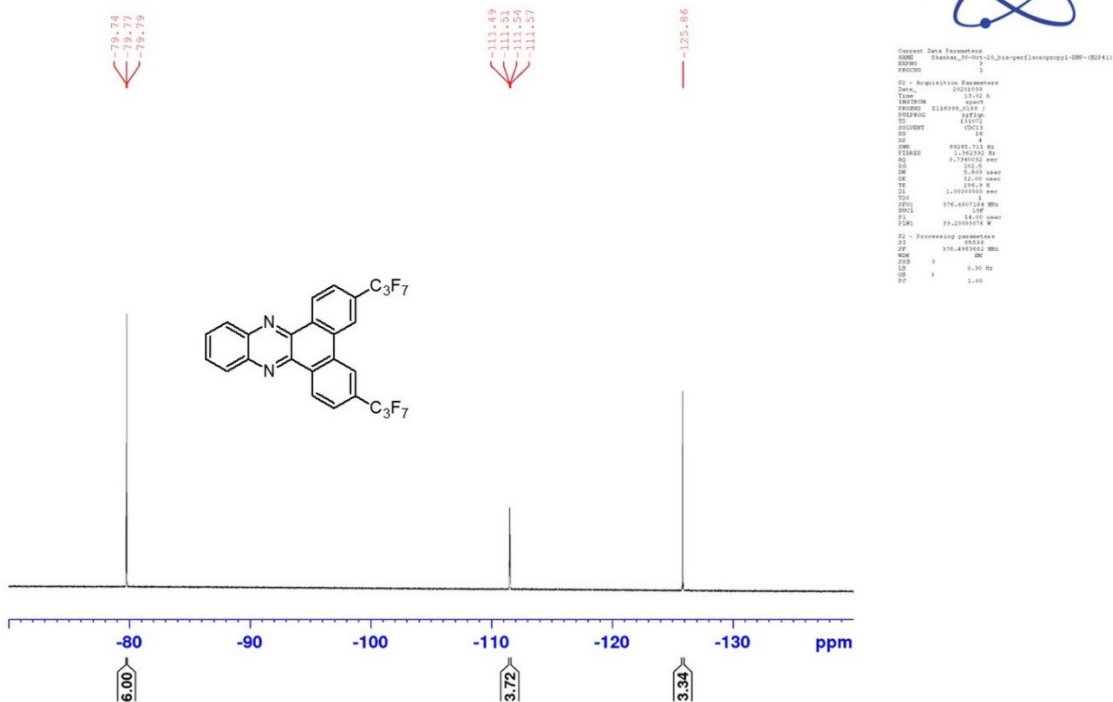

Figure S5:  $^{19}\text{F}$  NMR (376 MHz,  $\text{CDCl}_3$ ) spectrum of compound 3.

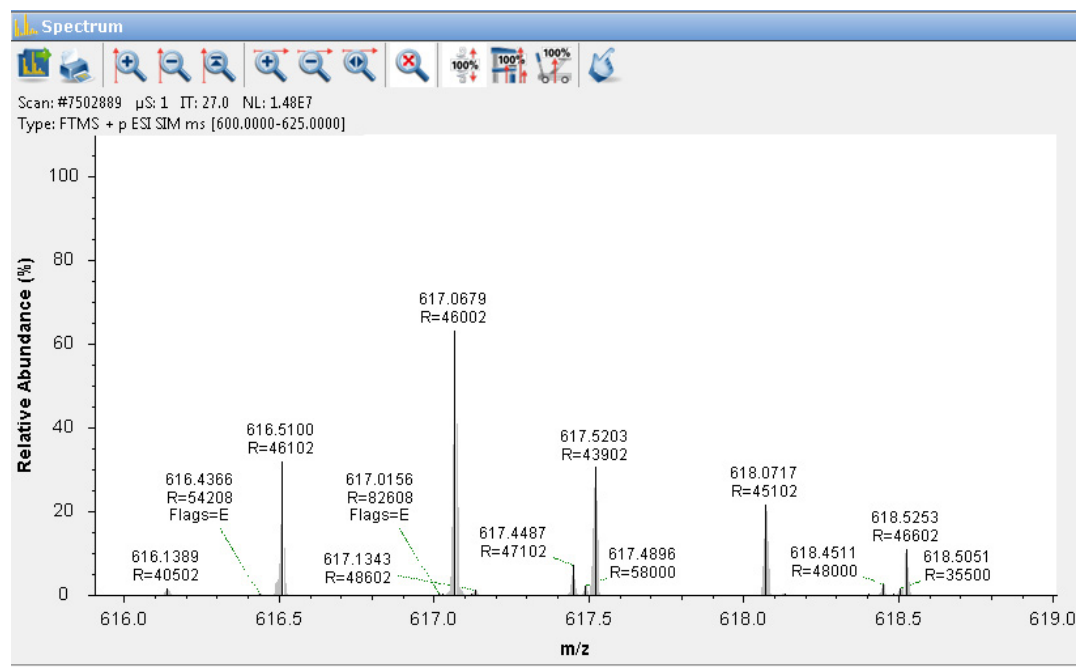

Figure S6: ESI-MS spectrum of compound 3

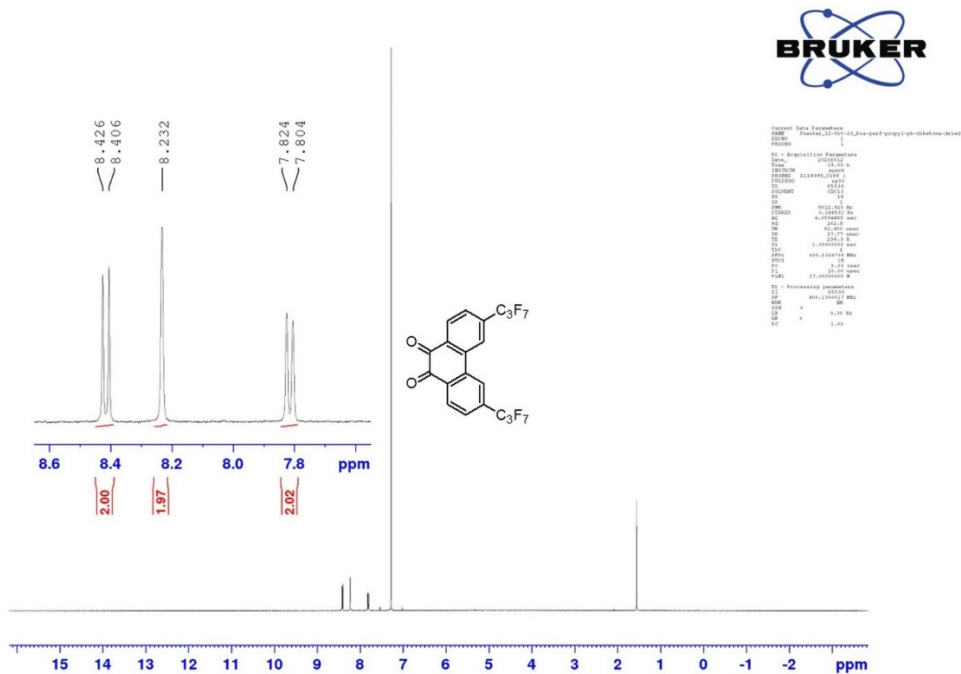

**Figure S7:** <sup>1</sup>H NMR (400 MHz, CDCl<sub>3</sub>) spectrum of 3,6-bis(perfluoropropyl)phenanthrene-9,10-dione.

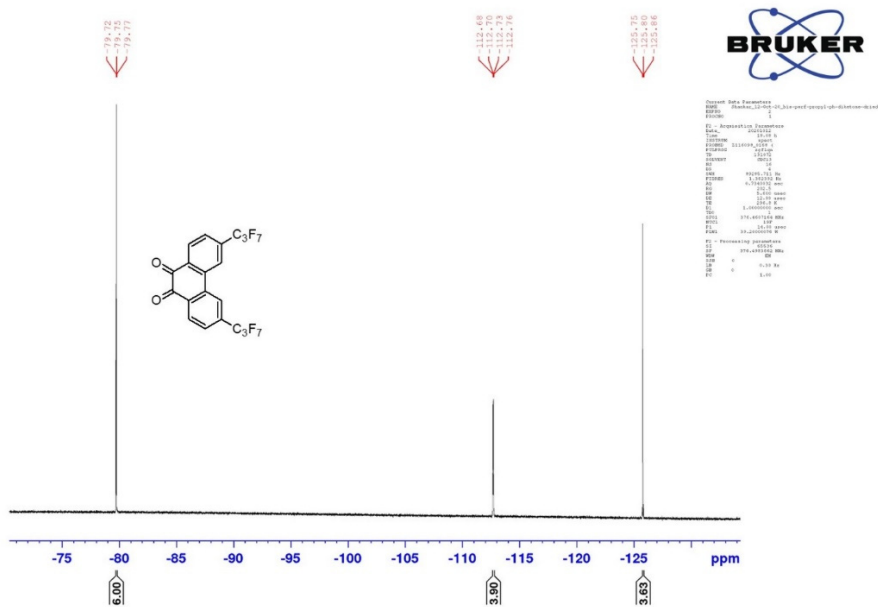

**Figure S8:** <sup>19</sup>F NMR (376 MHz, CDCl<sub>3</sub>) spectrum of 3,6-bis(perfluoropropyl)phenanthrene-9,10-dione.



### 3. Crystal structure analysis:

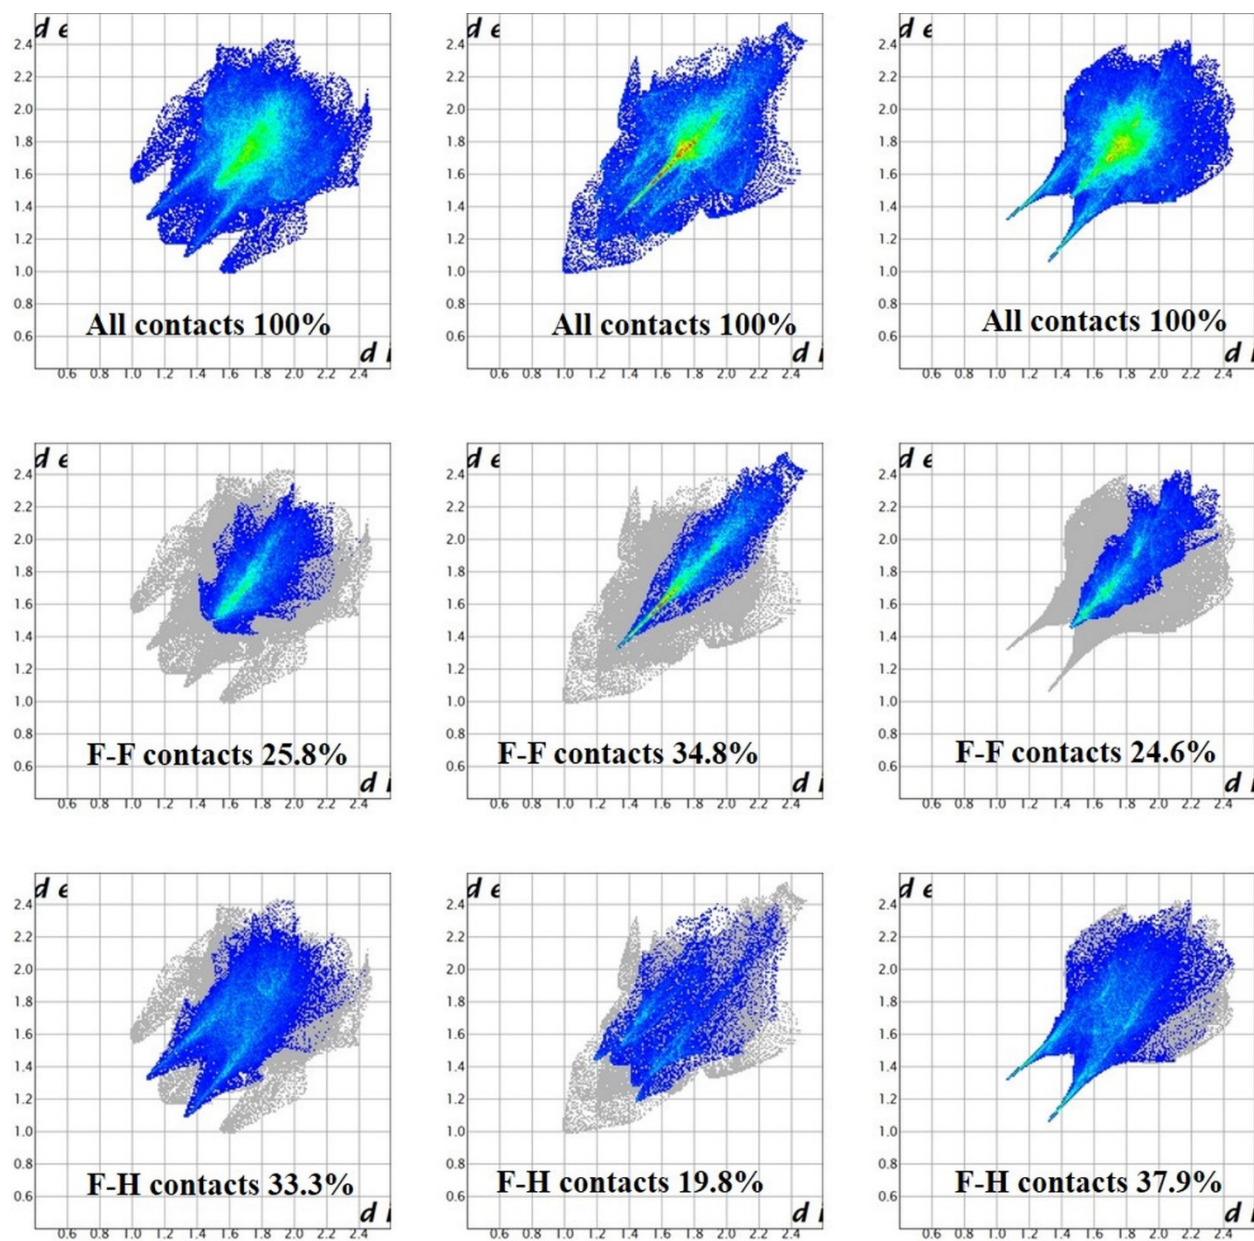

**Figure S9:** Comparison of 2D fingerprint plots of all, F-F, F-H contacts of compound 1,2 and 3.

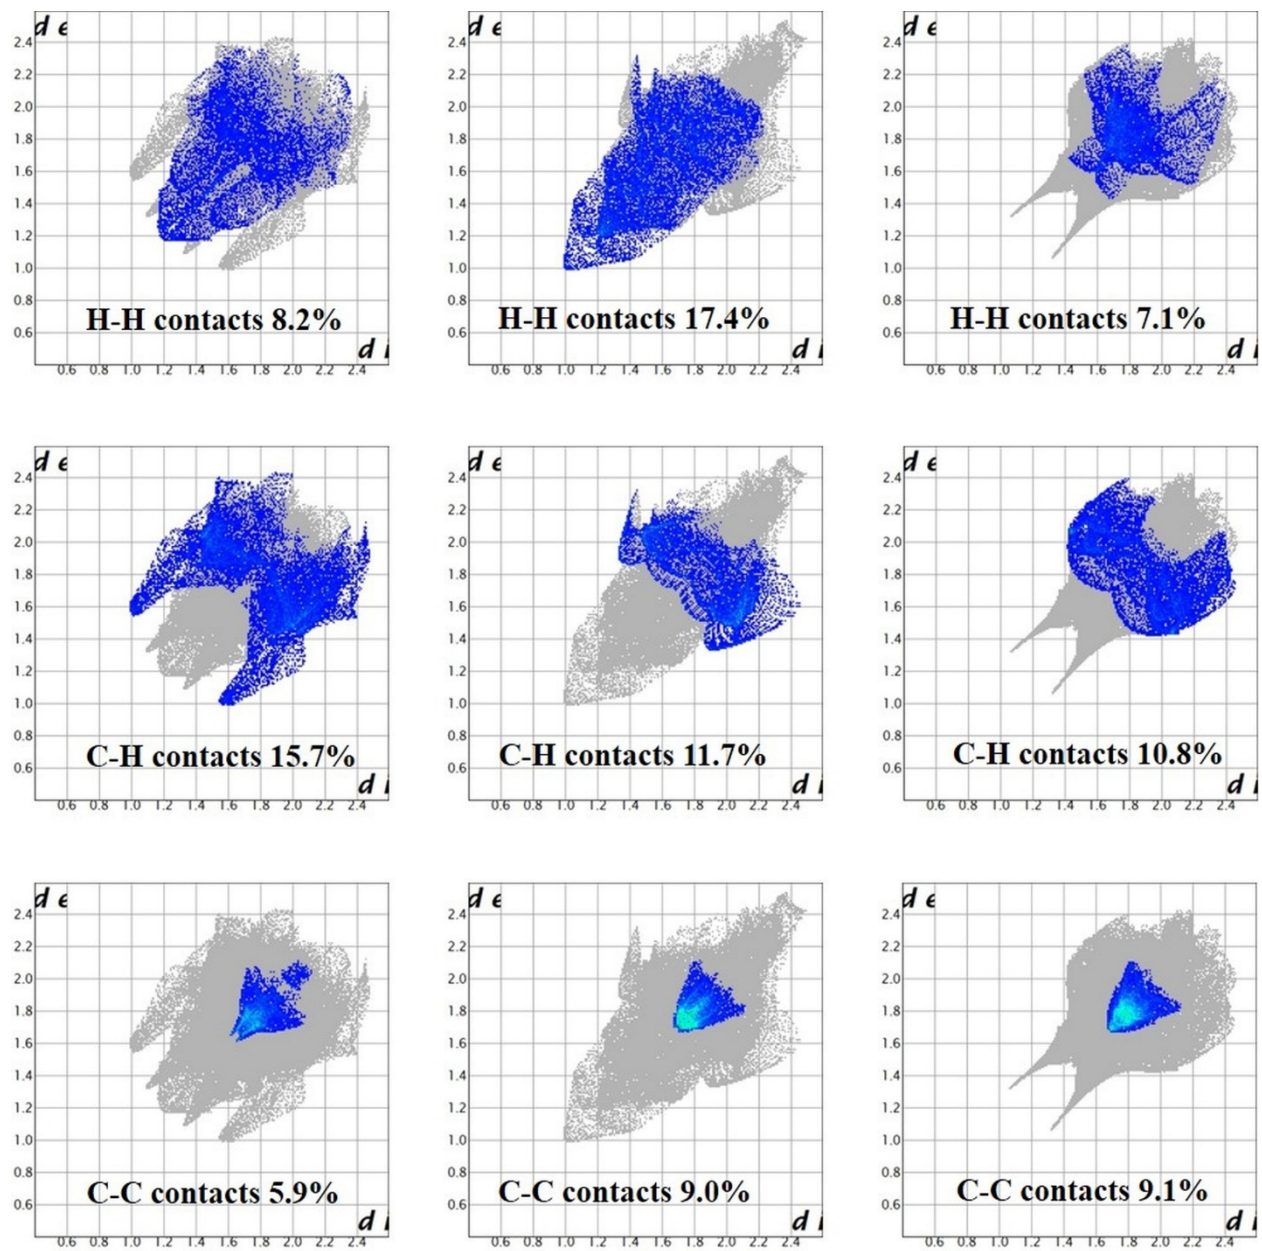

**Figure S10:** Comparison of 2D finger print plots of H-H, C-H, C-C contacts of compound **1,2** and **3**.

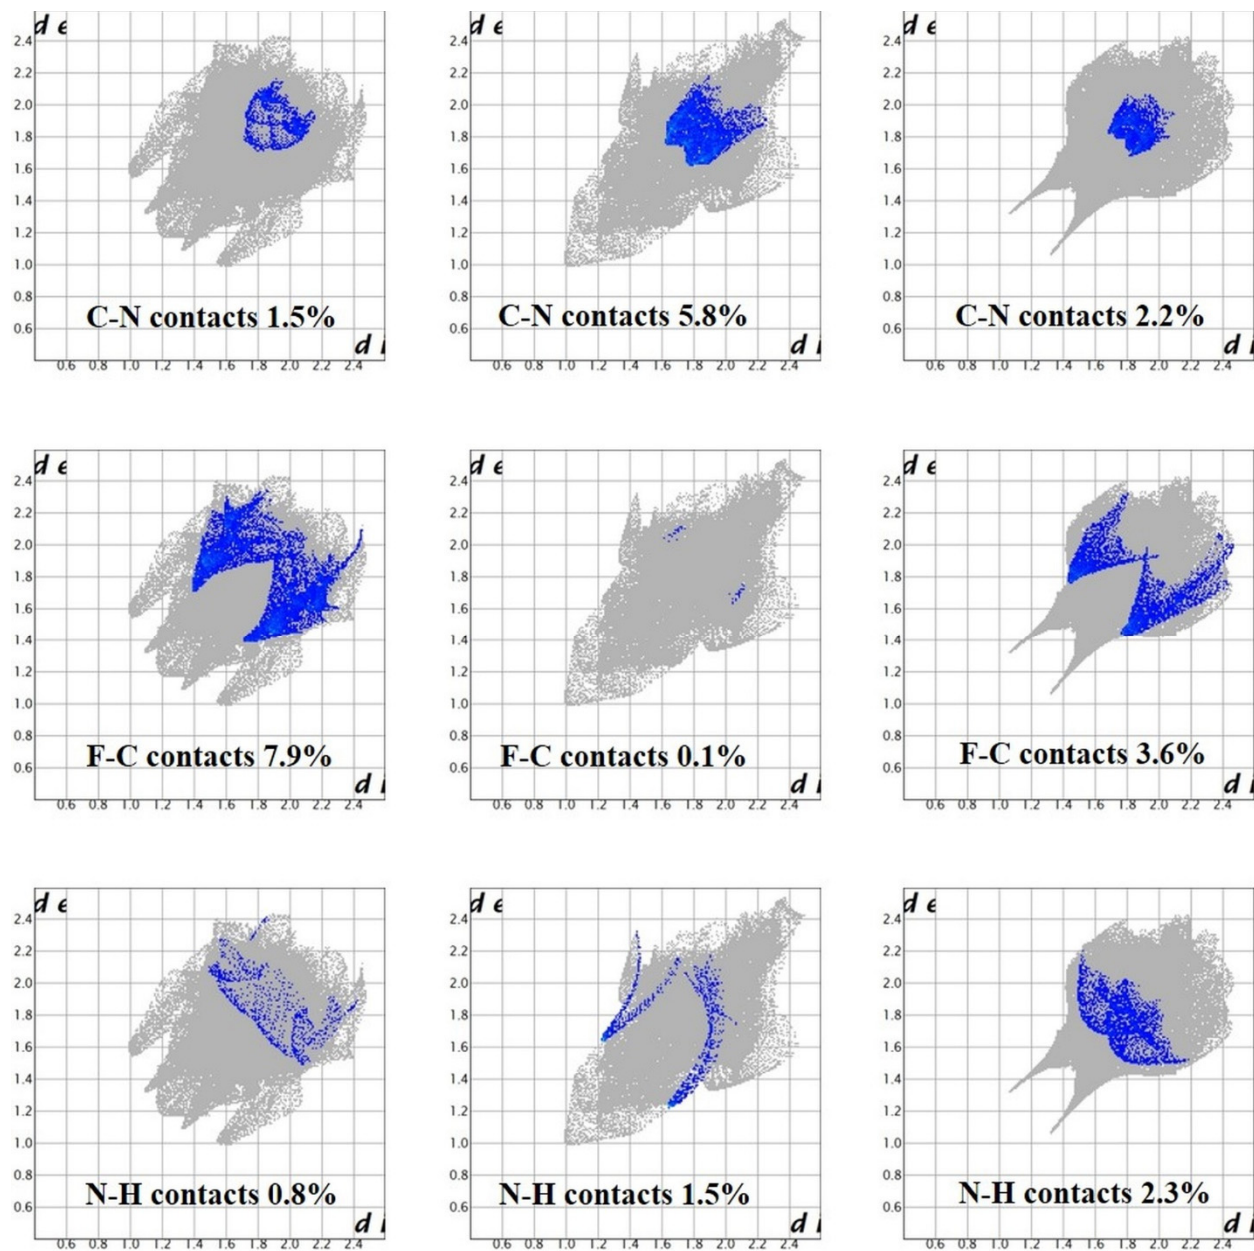

**Figure S11:** Comparison of 2D finger print plots of C-N, F-C, N-H contacts of compound **1,2** and **3**.

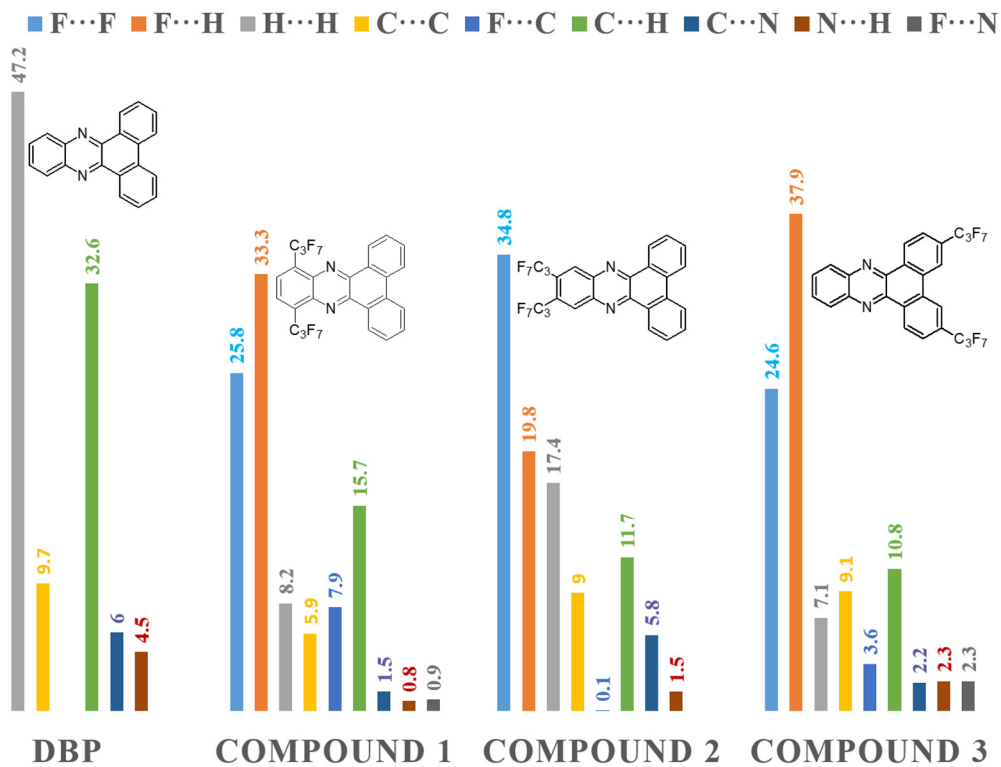

**Figure S12:** Short contact distributions of different intermolecular interactions in DBP, compounds 1-3 obtained from the Hirshfeld surface finger print plots.

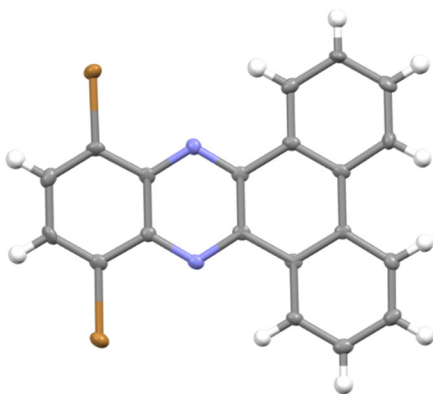

**Figure S13:** Crystal structure of 10,13-dibromo-dibenzo [a,c]phenazine (PBrDBP) with CCDC deposition number 2053442.

#### 4. Computational work:

Geometry optimization was done with DFT method at B3LYP/6-311G(d,p) level of theory. All calculated geometries were checked with frequency calculation at B3LYP/6-311G(d,p) level of theory to make sure the optimized geometry is a local minimum. Dimer interaction energy calculations were performed using M06-2X/TZVP method and basis set with BSSE correction. Neutral, anion, cation structures were optimized under fully relaxed conditions followed by frequency calculations to make sure local minima was achieved and no imaginary frequency was observed in the vibrational spectra. Electron affinity (EA), ionization potential (IP) and reorganization energy ( $\lambda$ ) were calculated under adiabatic conditions using the below formula.<sup>1</sup>

EA = Neutral Energy of the molecule ( $E_{\text{neutral}}$ ) - Anion Energy of the molecule ( $E_{\text{anion}}$ )

IP = Cation Energy of the molecule ( $E_{\text{cation}}$ ) - Neutral Energy of the molecule ( $E_{\text{neutral}}$ )

Adiabatic reorganization energy was calculated according to the following formula.

Reorganization energy for electron transfer ( $\lambda_i^e$ ) =  $\lambda_1 + \lambda_2$

$\lambda_1$  = Anion Energy with neutral state structure – Anion Energy with anion state structure

$\lambda_2$  = Neutral Energy with anion state structure – Neutral Energy with neutral state structure

Reorganization energy for hole transfer ( $\lambda_i^h$ ) =  $\lambda_1 + \lambda_2$

$\lambda_1$  = Cation Energy with neutral state structure – Cation Energy with cation state structure

$\lambda_2$  = Neutral Energy with cation state structure – Neutral Energy with neutral state structure

XYZ coordinates of optimized geometry of DBP\_neutral

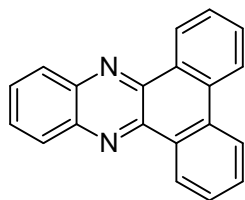

|   |   |           |           |           |
|---|---|-----------|-----------|-----------|
| C | 6 | 2.209754  | 0.736041  | -0.000065 |
| C | 6 | 2.209755  | -0.736038 | 0.000065  |
| C | 6 | 0.985315  | 1.445923  | 0.000081  |
| C | 6 | 0.985317  | -1.445922 | -0.000082 |
| N | 7 | -1.418052 | 1.404895  | 0.000571  |
| N | 7 | -1.418046 | -1.404911 | -0.000572 |
| C | 6 | -3.816875 | 1.410459  | 0.000800  |
| C | 6 | -3.816877 | -1.410437 | -0.000800 |
| H | 1 | -3.790770 | 2.493468  | 0.001411  |
| C | 6 | -2.578587 | 0.715647  | 0.000159  |
| C | 6 | -2.578585 | -0.715658 | -0.000159 |
| C | 6 | -0.285408 | 0.718946  | 0.000300  |
| C | 6 | -0.285408 | -0.718951 | -0.000302 |
| C | 6 | 0.985185  | 2.851598  | -0.000057 |
| C | 6 | 0.985188  | -2.851596 | 0.000057  |
| H | 1 | 0.029058  | 3.357717  | 0.000062  |

|   |   |           |           |           |
|---|---|-----------|-----------|-----------|
| H | 1 | 0.029061  | -3.357716 | -0.000063 |
| C | 6 | 3.387642  | 2.869014  | -0.000424 |
| C | 6 | 3.387645  | -2.869010 | 0.000425  |
| H | 1 | 4.324339  | 3.415089  | -0.000638 |
| H | 1 | 4.324343  | -3.415084 | 0.000639  |
| C | 6 | 3.402554  | 1.485211  | -0.000310 |
| C | 6 | 3.402555  | -1.485207 | 0.000310  |
| H | 1 | 4.359270  | 0.980950  | -0.000454 |
| H | 1 | 4.359271  | -0.980945 | 0.000455  |
| C | 6 | 2.171218  | 3.560544  | -0.000303 |
| C | 6 | 2.171222  | -3.560542 | 0.000303  |
| H | 1 | 2.158580  | 4.644402  | -0.000400 |
| H | 1 | 2.158586  | -4.644400 | 0.000401  |
| C | 6 | -4.996213 | 0.709858  | 0.000640  |
| C | 6 | -4.996220 | -0.709856 | -0.000639 |
| H | 1 | -5.941676 | -1.240425 | -0.000618 |
| H | 1 | -3.790767 | -2.493521 | -0.001410 |
| H | 1 | -5.941671 | 1.240423  | 0.000620  |

Total electronic energy = -879.104531840

XYZ coordinates of optimized geometry of DBP<sub>-</sub>anion

|   |   |           |           |           |
|---|---|-----------|-----------|-----------|
| C | 6 | 2.231706  | 0.728331  | -0.000008 |
| C | 6 | 2.231706  | -0.728331 | 0.000008  |
| C | 6 | 0.986989  | 1.423865  | 0.000006  |
| C | 6 | 0.986990  | -1.423865 | -0.000006 |
| N | 7 | -1.422435 | 1.427698  | 0.000039  |
| N | 7 | -1.422435 | -1.427698 | -0.000039 |
| C | 6 | -3.825655 | 1.396432  | 0.000053  |
| C | 6 | -3.825655 | -1.396432 | -0.000053 |
| H | 1 | -3.798949 | 2.481366  | 0.000090  |
| C | 6 | -2.587351 | 0.719473  | 0.000026  |
| C | 6 | -2.587351 | -0.719473 | -0.000026 |
| C | 6 | -0.278503 | 0.709969  | 0.000014  |
| C | 6 | -0.278503 | -0.709969 | -0.000014 |
| C | 6 | 0.990533  | 2.838896  | 0.000005  |
| C | 6 | 0.990533  | -2.838896 | -0.000005 |
| H | 1 | 0.025708  | 3.329651  | 0.000022  |
| H | 1 | 0.025708  | -3.329651 | -0.000022 |
| C | 6 | 3.399464  | 2.874917  | -0.000051 |
| C | 6 | 3.399464  | -2.874917 | 0.000050  |
| H | 1 | 4.332687  | 3.429732  | -0.000083 |
| H | 1 | 4.332687  | -3.429732 | 0.000083  |
| C | 6 | 3.419000  | 1.492929  | -0.000045 |
| C | 6 | 3.419000  | -1.492929 | 0.000045  |
| H | 1 | 4.378802  | 0.990312  | -0.000080 |

|   |   |           |           |           |
|---|---|-----------|-----------|-----------|
| H | 1 | 4.378802  | -0.990312 | 0.000080  |
| C | 6 | 2.167959  | 3.555104  | -0.000020 |
| C | 6 | 2.167959  | -3.555104 | 0.000020  |
| H | 1 | 2.145435  | 4.640878  | -0.000022 |
| H | 1 | 2.145435  | -4.640878 | 0.000022  |
| C | 6 | -5.030213 | 0.700150  | 0.000026  |
| C | 6 | -5.030213 | -0.700150 | -0.000026 |
| H | 1 | -5.970218 | -1.244427 | -0.000049 |
| H | 1 | -3.798949 | -2.481367 | -0.000090 |
| H | 1 | -5.970218 | 1.244427  | 0.000049  |

Total electronic energy = -879.146550551

XYZ coordinates of optimized geometry of DBP\_cation

|   |   |           |           |           |
|---|---|-----------|-----------|-----------|
| C | 6 | 2.215613  | -0.718348 | -0.000023 |
| C | 6 | 2.215615  | 0.718346  | 0.000042  |
| C | 6 | 0.969979  | -1.442268 | -0.000020 |
| C | 6 | 0.969985  | 1.442268  | 0.000034  |
| N | 7 | -1.425558 | -1.405655 | -0.000020 |
| N | 7 | -1.425554 | 1.405659  | 0.000017  |
| C | 6 | -3.818368 | -1.412550 | -0.000034 |
| C | 6 | -3.818364 | 1.412554  | 0.000003  |
| H | 1 | -3.797941 | -2.495240 | -0.000047 |
| C | 6 | -2.584977 | -0.716980 | -0.000018 |
| C | 6 | -2.584975 | 0.716986  | -0.000002 |
| C | 6 | -0.294511 | -0.715583 | -0.000004 |
| C | 6 | -0.294509 | 0.715586  | 0.000017  |
| C | 6 | 0.978349  | -2.839125 | -0.000032 |
| C | 6 | 0.978358  | 2.839123  | 0.000044  |
| H | 1 | 0.030437  | -3.359433 | -0.000019 |
| H | 1 | 0.030444  | 3.359427  | 0.000027  |
| C | 6 | 3.406849  | -2.845742 | -0.000105 |
| C | 6 | 3.406859  | 2.845736  | 0.000122  |
| H | 1 | 4.336682  | -3.400772 | -0.000155 |
| H | 1 | 4.336692  | 3.400766  | 0.000171  |
| C | 6 | 3.425621  | -1.474055 | -0.000086 |
| C | 6 | 3.425627  | 1.474049  | 0.000104  |
| H | 1 | 4.379888  | -0.968763 | -0.000138 |
| H | 1 | 4.379891  | 0.968752  | 0.000153  |
| C | 6 | 2.176115  | -3.537157 | -0.000066 |
| C | 6 | 2.176126  | 3.537153  | 0.000080  |
| H | 1 | 2.168475  | -4.620660 | -0.000070 |
| H | 1 | 2.168492  | 4.620656  | 0.000083  |
| C | 6 | -5.006220 | -0.705263 | -0.000033 |
| C | 6 | -5.006218 | 0.705269  | -0.000013 |
| H | 1 | -5.949530 | 1.237640  | -0.000012 |

|   |   |           |           |           |
|---|---|-----------|-----------|-----------|
| H | 1 | -3.797942 | 2.495245  | 0.000017  |
| H | 1 | -5.949534 | -1.237632 | -0.000044 |

Total electronic energy = -878.825740329

XYZ coordinates of optimized geometry of compound 1\_neutral

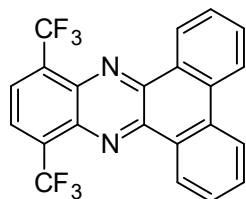

|    |   |           |           |           |
|----|---|-----------|-----------|-----------|
| 1  | 9 | -2.055538 | -3.439944 | 1.086234  |
| 2  | 9 | -2.056298 | 3.440085  | -1.086572 |
| 3  | 9 | -3.930712 | -3.400272 | -0.000272 |
| 4  | 9 | -3.930677 | 3.400289  | 0.001304  |
| 5  | 7 | -0.240082 | -1.397945 | -0.000246 |
| 6  | 7 | -0.240078 | 1.397918  | 0.000020  |
| 7  | 6 | -1.399205 | 0.714796  | -0.000004 |
| 8  | 6 | 0.895198  | 0.718796  | -0.000081 |
| 9  | 6 | -2.644931 | -1.414541 | -0.000397 |
| 10 | 6 | 0.895207  | -0.718832 | -0.000130 |
| 11 | 6 | -2.644925 | 1.414545  | 0.000279  |
| 12 | 6 | -2.662520 | -2.925504 | -0.000453 |
| 13 | 6 | 3.384585  | -0.736326 | 0.000224  |
| 14 | 6 | 2.160640  | 1.447942  | -0.000184 |
| 15 | 6 | 2.160637  | -1.447961 | 0.000054  |
| 16 | 6 | 3.384590  | 0.736324  | -0.000219 |
| 17 | 6 | -2.662495 | 2.925500  | 0.000491  |
| 18 | 6 | -3.820082 | -0.707529 | -0.000145 |
| 19 | 1 | -4.763875 | -1.235236 | -0.000575 |
| 20 | 6 | -1.399197 | -0.714825 | -0.000326 |
| 21 | 6 | 4.576052  | 1.486179  | -0.000738 |
| 22 | 1 | 5.533587  | 0.983816  | -0.001009 |
| 23 | 6 | 2.155568  | -2.853825 | 0.000367  |
| 24 | 1 | 1.199281  | -3.359984 | 0.000210  |
| 25 | 6 | 2.155518  | 2.853805  | -0.000497 |
| 26 | 1 | 1.199222  | 3.359948  | -0.000485 |
| 27 | 6 | -3.820092 | 0.707545  | 0.000283  |
| 28 | 1 | -4.763883 | 1.235258  | 0.000851  |
| 29 | 6 | 3.341656  | 3.562412  | -0.000893 |
| 30 | 1 | 3.328874  | 4.645950  | -0.001097 |
| 31 | 6 | 3.341722  | -3.562409 | 0.000896  |
| 32 | 1 | 3.328977  | -4.645948 | 0.001140  |



|    |   |           |           |           |
|----|---|-----------|-----------|-----------|
| 33 | 6 | 4.576066  | -1.486146 | 0.000930  |
| 34 | 1 | 5.533585  | -0.983754 | 0.001366  |
| 35 | 6 | 4.557848  | 2.870460  | -0.001059 |
| 36 | 1 | 5.493853  | 3.417492  | -0.001537 |
| 37 | 6 | 4.557893  | -2.870434 | 0.001222  |
| 38 | 1 | 5.493907  | -3.417450 | 0.001795  |
| 39 | 9 | -2.055243 | 3.440013  | 1.087172  |
| 40 | 9 | -2.056066 | -3.440144 | -1.087510 |

Total electronic energy = -1553.37399459

XYZ coordinates of optimized geometry of compound 1\_anion

|   |   |           |           |           |
|---|---|-----------|-----------|-----------|
| F | 9 | 2.073875  | -3.461296 | -1.085263 |
| F | 9 | 2.073903  | 3.461297  | 1.085261  |
| F | 9 | 3.948977  | -3.388469 | -0.000253 |
| F | 9 | 3.948976  | 3.388470  | 0.000200  |
| N | 7 | 0.239382  | -1.413210 | -0.000121 |
| N | 7 | 0.239382  | 1.413210  | 0.000125  |
| C | 6 | 1.397274  | 0.724162  | 0.000057  |
| C | 6 | -0.910912 | 0.705006  | 0.000072  |
| C | 6 | 2.643977  | -1.409205 | -0.000110 |
| C | 6 | -0.910912 | -0.705006 | -0.000061 |
| C | 6 | 2.643976  | 1.409206  | 0.000093  |
| C | 6 | 2.669140  | -2.903824 | -0.000217 |
| C | 6 | -3.410353 | -0.730379 | -0.000080 |
| C | 6 | -2.170738 | 1.428405  | 0.000165  |
| C | 6 | -2.170738 | -1.428405 | -0.000148 |
| C | 6 | -3.410353 | 0.730379  | 0.000102  |
| C | 6 | 2.669139  | 2.903824  | 0.000197  |
| C | 6 | 3.847479  | -0.693705 | -0.000066 |
| H | 1 | 4.785872  | -1.231300 | -0.000109 |
| C | 6 | 1.397274  | -0.724162 | -0.000057 |
| C | 6 | -4.598306 | 1.492876  | 0.000226  |
| H | 1 | -5.558236 | 0.991413  | 0.000204  |
| C | 6 | -2.167617 | -2.841049 | -0.000311 |
| H | 1 | -1.203581 | -3.333355 | -0.000354 |
| C | 6 | -2.167617 | 2.841048  | 0.000327  |
| H | 1 | -1.203581 | 3.333355  | 0.000366  |
| C | 6 | 3.847479  | 0.693705  | 0.000031  |
| H | 1 | 4.785872  | 1.231301  | 0.000059  |
| C | 6 | -3.346981 | 3.555978  | 0.000436  |
| H | 1 | -3.325242 | 4.641135  | 0.000562  |
| C | 6 | -3.346981 | -3.555979 | -0.000414 |
| H | 1 | -3.325242 | -4.641135 | -0.000539 |
| C | 6 | -4.598306 | -1.492877 | -0.000198 |
| H | 1 | -5.558236 | -0.991414 | -0.000171 |

|   |   |           |           |           |
|---|---|-----------|-----------|-----------|
| C | 6 | -4.575727 | 2.875043  | 0.000389  |
| H | 1 | -5.508474 | 3.430153  | 0.000484  |
| C | 6 | -4.575727 | -2.875043 | -0.000361 |
| H | 1 | -5.508474 | -3.430154 | -0.000452 |
| F | 9 | 2.073851  | 3.461448  | -1.084759 |
| F | 9 | 2.073880  | -3.461449 | 1.084756  |

Total electronic energy = -1553.44142964

XYZ coordinates of optimized geometry of compound 1\_cation

|   |   |           |           |           |
|---|---|-----------|-----------|-----------|
| F | 9 | 2.036748  | -3.441721 | -1.087351 |
| F | 9 | 2.036724  | 3.441745  | 1.087339  |
| F | 9 | 3.914367  | -3.412438 | -0.000172 |
| F | 9 | 3.914326  | 3.412477  | 0.000131  |
| N | 7 | 0.242505  | -1.406397 | -0.000086 |
| N | 7 | 0.242483  | 1.406401  | 0.000090  |
| C | 6 | 1.384624  | 0.729727  | 0.000038  |
| C | 6 | -0.907536 | 0.725724  | 0.000061  |
| C | 6 | 2.637510  | -1.430607 | -0.000076 |
| C | 6 | -0.907526 | -0.725729 | -0.000048 |
| C | 6 | 2.637488  | 1.430634  | 0.000058  |
| C | 6 | 2.653948  | -2.947480 | -0.000147 |
| C | 6 | -3.381710 | -0.737048 | -0.000096 |
| C | 6 | -2.146711 | 1.447457  | 0.000156  |
| C | 6 | -2.146683 | -1.447479 | -0.000138 |
| C | 6 | -3.381717 | 0.737016  | 0.000121  |
| C | 6 | 2.653910  | 2.947507  | 0.000127  |
| C | 6 | 3.798769  | -0.716618 | -0.000050 |
| H | 1 | 4.748189  | -1.235730 | -0.000080 |
| C | 6 | 1.384634  | -0.729712 | -0.000040 |
| C | 6 | -4.555209 | 1.490817  | 0.000317  |
| H | 1 | -5.521895 | 1.006297  | 0.000354  |
| C | 6 | -2.130128 | -2.868871 | -0.000308 |
| H | 1 | -1.169152 | -3.365827 | -0.000320 |
| C | 6 | -2.130180 | 2.868844  | 0.000326  |
| H | 1 | -1.169211 | 3.365815  | 0.000334  |
| C | 6 | 3.798757  | 0.716656  | 0.000015  |
| H | 1 | 4.748171  | 1.235782  | 0.000032  |
| C | 6 | -3.311183 | 3.584517  | 0.000488  |
| H | 1 | -3.296595 | 4.666834  | 0.000618  |
| C | 6 | -3.311113 | -3.584552 | -0.000465 |
| H | 1 | -3.296517 | -4.666869 | -0.000595 |
| C | 6 | -4.555187 | -1.490866 | -0.000286 |
| H | 1 | -5.521882 | -1.006364 | -0.000317 |
| C | 6 | -4.523844 | 2.892698  | 0.000493  |
| H | 1 | -5.459654 | 3.439031  | 0.000638  |

|   |   |           |           |           |
|---|---|-----------|-----------|-----------|
| C | 6 | -4.523793 | -2.892741 | -0.000463 |
| H | 1 | -5.459593 | -3.439092 | -0.000603 |
| F | 9 | 2.036694  | 3.441841  | -1.087023 |
| F | 9 | 2.036753  | -3.441822 | 1.087011  |

Total electronic energy = -1553.07758194

XYZ coordinates of optimized geometry of compound 2\_neutral

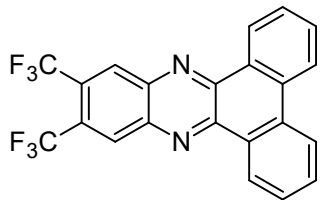

|   |   |           |           |           |
|---|---|-----------|-----------|-----------|
| F | 9 | 0.224953  | 2.848152  | -4.000895 |
| F | 9 | -0.224953 | -2.848152 | -4.000895 |
| F | 9 | 0.815879  | 1.135966  | -5.184637 |
| F | 9 | -0.815879 | -1.135966 | -5.184637 |
| C | 6 | 0.000018  | 0.736088  | 4.229436  |
| C | 6 | -0.000018 | -0.736088 | 4.229436  |
| C | 6 | -0.000116 | 1.447510  | 3.005629  |
| C | 6 | 0.000116  | -1.447510 | 3.005629  |
| N | 7 | -0.000576 | 1.406924  | 0.604140  |
| N | 7 | 0.000576  | -1.406924 | 0.604140  |
| C | 6 | -0.003573 | 1.397509  | -1.790464 |
| C | 6 | 0.003573  | -1.397509 | -1.790464 |
| H | 1 | -0.007141 | 2.477985  | -1.766251 |
| H | 1 | 0.007141  | -2.477985 | -1.766251 |
| C | 6 | -0.000507 | 0.710469  | -0.551259 |
| C | 6 | 0.000507  | -0.710469 | -0.551259 |
| C | 6 | -0.000187 | 0.721497  | 1.736681  |
| C | 6 | 0.000187  | -0.721497 | 1.736681  |
| C | 6 | -0.000133 | 2.853369  | 3.004354  |
| C | 6 | 0.000133  | -2.853369 | 3.004354  |
| H | 1 | -0.000208 | 3.361347  | 2.049342  |
| H | 1 | 0.000208  | -3.361347 | 2.049342  |
| C | 6 | 0.000187  | 2.868758  | 5.406183  |
| C | 6 | -0.000187 | -2.868758 | 5.406183  |
| H | 1 | 0.000336  | 3.414543  | 6.342887  |
| H | 1 | -0.000336 | -3.414543 | 6.342887  |
| C | 6 | -0.059998 | 1.551503  | -4.251571 |
| C | 6 | 0.059998  | -1.551503 | -4.251571 |
| C | 6 | 0.000171  | 1.484689  | 5.421839  |

|   |   |           |           |           |
|---|---|-----------|-----------|-----------|
| C | 6 | -0.000171 | -1.484689 | 5.421839  |
| H | 1 | 0.000336  | 0.981122  | 6.378678  |
| H | 1 | -0.000336 | -0.981122 | 6.378678  |
| C | 6 | 0.000018  | 3.561521  | 4.190633  |
| C | 6 | -0.000018 | -3.561521 | 4.190633  |
| H | 1 | 0.000016  | 4.645137  | 4.178780  |
| H | 1 | -0.000016 | -4.645137 | 4.178780  |
| C | 6 | -0.000822 | 0.719036  | -2.984131 |
| C | 6 | 0.000822  | -0.719036 | -2.984131 |
| F | 9 | -1.289254 | 1.527603  | -4.805179 |
| F | 9 | 1.289254  | -1.527603 | -4.805179 |

Total electronic energy = -1553.37007067

XYZ coordinates of optimized geometry of compound 2\_anion

|   |   |           |           |           |
|---|---|-----------|-----------|-----------|
| F | 9 | 0.278314  | 2.841267  | -4.018422 |
| F | 9 | -0.278314 | -2.841267 | -4.018422 |
| F | 9 | 0.803338  | 1.122839  | -5.224627 |
| F | 9 | -0.803338 | -1.122839 | -5.224627 |
| C | 6 | 0.000786  | 0.729247  | 4.258754  |
| C | 6 | -0.000786 | -0.729247 | 4.258754  |
| C | 6 | 0.001250  | 1.425687  | 3.017183  |
| C | 6 | -0.001250 | -1.425687 | 3.017183  |
| N | 7 | 0.000266  | 1.426906  | 0.606261  |
| N | 7 | -0.000266 | -1.426906 | 0.606261  |
| C | 6 | -0.000046 | 1.387211  | -1.788854 |
| C | 6 | 0.000046  | -1.387211 | -1.788854 |
| H | 1 | 0.001745  | 2.467955  | -1.765323 |
| H | 1 | -0.001745 | -2.467955 | -1.765323 |
| C | 6 | 0.000046  | 0.717162  | -0.547279 |
| C | 6 | -0.000046 | -0.717162 | -0.547279 |
| C | 6 | 0.000252  | 0.707501  | 1.754740  |
| C | 6 | -0.000252 | -0.707501 | 1.754740  |
| C | 6 | 0.002744  | 2.839403  | 3.017777  |
| C | 6 | -0.002744 | -2.839403 | 3.017777  |
| H | 1 | 0.002991  | 3.332212  | 2.054352  |
| H | 1 | -0.002991 | -3.332212 | 2.054352  |
| C | 6 | 0.003536  | 2.873861  | 5.425732  |
| C | 6 | -0.003536 | -2.873861 | 5.425732  |
| H | 1 | 0.004490  | 3.428660  | 6.358604  |
| H | 1 | -0.004490 | -3.428660 | 6.358604  |
| C | 6 | -0.046053 | 1.543586  | -4.254679 |
| C | 6 | 0.046053  | -1.543586 | -4.254679 |
| C | 6 | 0.002010  | 1.491967  | 5.446762  |
| C | 6 | -0.002010 | -1.491967 | 5.446762  |

|   |   |           |           |           |
|---|---|-----------|-----------|-----------|
| H | 1 | 0.001861  | 0.989858  | 6.406353  |
| H | 1 | -0.001861 | -0.989858 | 6.406353  |
| C | 6 | 0.003886  | 3.554641  | 4.196320  |
| C | 6 | -0.003886 | -3.554641 | 4.196320  |
| H | 1 | 0.005110  | 4.639943  | 4.174729  |
| H | 1 | -0.005110 | -4.639943 | 4.174729  |
| C | 6 | 0.005563  | 0.709544  | -3.006210 |
| C | 6 | -0.005563 | -0.709544 | -3.006210 |
| F | 9 | -1.282342 | 1.577333  | -4.822954 |
| F | 9 | 1.282342  | -1.577333 | -4.822954 |

Total electronic energy = -1553.43765793

XYZ coordinates of optimized geometry of compound 2\_cation

|   |   |           |           |           |
|---|---|-----------|-----------|-----------|
| F | 9 | 0.182724  | 2.852686  | -3.988628 |
| F | 9 | -0.182724 | -2.852686 | -3.988628 |
| F | 9 | 0.809344  | 1.144461  | -5.160049 |
| F | 9 | -0.809344 | -1.144461 | -5.160049 |
| C | 6 | 0.001131  | 0.736754  | 4.225999  |
| C | 6 | -0.001131 | -0.736754 | 4.225999  |
| C | 6 | 0.001816  | 1.447093  | 2.991349  |
| C | 6 | -0.001816 | -1.447093 | 2.991349  |
| N | 7 | 0.000584  | 1.415900  | 0.600749  |
| N | 7 | -0.000584 | -1.415900 | 0.600749  |
| C | 6 | -0.004873 | 1.411641  | -1.784556 |
| C | 6 | 0.004873  | -1.411641 | -1.784556 |
| H | 1 | -0.011447 | 2.492176  | -1.765046 |
| H | 1 | 0.011447  | -2.492176 | -1.765046 |
| C | 6 | 0.000122  | 0.724874  | -0.537088 |
| C | 6 | -0.000122 | -0.724874 | -0.537088 |
| C | 6 | 0.000541  | 0.728717  | 1.748371  |
| C | 6 | -0.000541 | -0.728717 | 1.748371  |
| C | 6 | 0.003848  | 2.868227  | 2.979468  |
| C | 6 | -0.003848 | -2.868227 | 2.979468  |
| H | 1 | 0.004350  | 3.368045  | 2.020542  |
| H | 1 | -0.004350 | -3.368045 | 2.020542  |
| C | 6 | 0.004639  | 2.890190  | 5.372844  |
| C | 6 | -0.004639 | -2.890190 | 5.372844  |
| H | 1 | 0.005770  | 3.435199  | 6.309397  |
| H | 1 | -0.005770 | -3.435199 | 6.309397  |
| C | 6 | -0.076897 | 1.558356  | -4.247419 |
| C | 6 | 0.076897  | -1.558356 | -4.247419 |
| C | 6 | 0.002583  | 1.488841  | 5.400955  |
| C | 6 | -0.002583 | -1.488841 | 5.400955  |
| H | 1 | 0.002187  | 1.002464  | 6.366593  |

|   |   |           |           |           |
|---|---|-----------|-----------|-----------|
| H | 1 | -0.002187 | -1.002464 | 6.366593  |
| C | 6 | 0.005250  | 3.583041  | 4.160821  |
| C | 6 | -0.005250 | -3.583041 | 4.160821  |
| H | 1 | 0.006852  | 4.665384  | 4.147502  |
| H | 1 | -0.006852 | -4.665384 | 4.147502  |
| C | 6 | -0.005250 | 0.728097  | -2.966103 |
| C | 6 | 0.005250  | -0.728097 | -2.966103 |
| F | 9 | -1.306110 | 1.493499  | -4.779331 |
| F | 9 | 1.306110  | -1.493499 | -4.779331 |

Total electronic energy = -1553.07034589

XYZ coordinates of optimized geometry of compound 3\_neutral

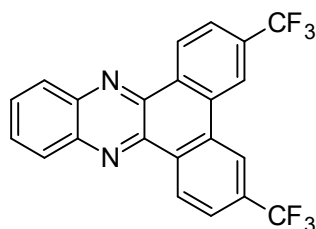

|   |   |           |           |           |
|---|---|-----------|-----------|-----------|
| C | 6 | 3.133179  | 3.648074  | 0.000221  |
| C | 6 | 1.850447  | 2.861439  | -0.000038 |
| C | 6 | 0.633347  | 3.558589  | -0.000348 |
| H | 1 | 0.626348  | 4.641593  | -0.000504 |
| C | 6 | -0.549158 | 2.850749  | -0.000429 |
| H | 1 | -1.503484 | 3.359525  | -0.000617 |
| C | 6 | -0.550054 | 1.444272  | -0.000246 |
| C | 6 | 0.672585  | 0.735392  | -0.000040 |
| C | 6 | 1.868132  | 1.479255  | 0.000112  |
| H | 1 | 2.825471  | 0.980212  | 0.000387  |
| C | 6 | -1.820242 | 0.717413  | -0.000186 |
| C | 6 | -4.111486 | 0.716566  | -0.000229 |
| C | 6 | -5.350041 | 1.411930  | -0.000472 |
| H | 1 | -5.324290 | 2.494782  | -0.000831 |
| C | 6 | -6.527811 | 0.710521  | -0.000241 |
| H | 1 | -7.473599 | 1.239946  | -0.000426 |
| N | 7 | -2.952224 | 1.405201  | -0.000412 |
| F | 9 | 4.227493  | 2.859524  | 0.000505  |
| F | 9 | 3.220546  | 4.452421  | 1.084066  |
| C | 6 | 3.133179  | -3.648074 | -0.000221 |
| C | 6 | 1.850447  | -2.861438 | 0.000038  |
| C | 6 | 0.633347  | -3.558589 | 0.000348  |
| H | 1 | 0.626348  | -4.641593 | 0.000504  |
| C | 6 | -0.549158 | -2.850749 | 0.000429  |
| H | 1 | -1.503484 | -3.359525 | 0.000617  |
| C | 6 | -0.550054 | -1.444272 | 0.000246  |

|   |   |           |           |           |
|---|---|-----------|-----------|-----------|
| C | 6 | 0.672585  | -0.735392 | 0.000040  |
| C | 6 | 1.868132  | -1.479255 | -0.000112 |
| H | 1 | 2.825471  | -0.980212 | -0.000387 |
| C | 6 | -1.820242 | -0.717413 | 0.000186  |
| C | 6 | -4.111486 | -0.716567 | 0.000229  |
| C | 6 | -5.350041 | -1.411930 | 0.000472  |
| H | 1 | -5.324290 | -2.494782 | 0.000831  |
| C | 6 | -6.527811 | -0.710521 | 0.000241  |
| H | 1 | -7.473599 | -1.239946 | 0.000426  |
| N | 7 | -2.952224 | -1.405201 | 0.000412  |
| F | 9 | 4.227493  | -2.859524 | -0.000504 |
| F | 9 | 3.220546  | -4.452421 | -1.084067 |
| F | 9 | 3.221042  | 4.452312  | -1.083684 |
| F | 9 | 3.221042  | -4.452312 | 1.083684  |

Total electronic energy = -1553.38148209

XYZ coordinates of optimized geometry of compound 3\_anion

|   |   |           |           |           |
|---|---|-----------|-----------|-----------|
| C | 6 | -0.000089 | -3.657495 | -3.123981 |
| C | 6 | -0.000041 | -2.866998 | -1.859655 |
| C | 6 | -0.000016 | -3.554978 | -0.625663 |
| H | 1 | -0.000014 | -4.638932 | -0.610012 |
| C | 6 | 0.000006  | -2.839608 | 0.546243  |
| H | 1 | 0.000022  | -3.333358 | 1.509038  |
| C | 6 | 0.000006  | -1.423024 | 0.551344  |
| C | 6 | -0.000006 | -0.727324 | -0.692984 |
| C | 6 | -0.000037 | -1.484372 | -1.881118 |
| H | 1 | -0.000063 | -0.986953 | -2.840530 |
| C | 6 | 0.000013  | -0.712597 | 1.816191  |
| C | 6 | 0.000021  | -0.718091 | 4.122866  |
| C | 6 | 0.000046  | -1.397211 | 5.358948  |
| H | 1 | 0.000081  | -2.481754 | 5.331860  |
| C | 6 | 0.000024  | -0.700782 | 6.561117  |
| H | 1 | 0.000043  | -1.243570 | 7.501394  |
| N | 7 | 0.000035  | -1.426527 | 2.956135  |
| F | 9 | -0.000057 | -2.889110 | -4.239789 |
| F | 9 | -1.082667 | -4.479230 | -3.225909 |
| C | 6 | 0.000089  | 3.657495  | -3.123981 |
| C | 6 | 0.000041  | 2.866998  | -1.859655 |
| C | 6 | 0.000016  | 3.554978  | -0.625663 |
| H | 1 | 0.000014  | 4.638932  | -0.610012 |
| C | 6 | -0.000006 | 2.839608  | 0.546243  |
| H | 1 | -0.000022 | 3.333358  | 1.509038  |
| C | 6 | -0.000006 | 1.423024  | 0.551344  |
| C | 6 | 0.000006  | 0.727324  | -0.692984 |

|   |   |           |           |           |
|---|---|-----------|-----------|-----------|
| C | 6 | 0.000037  | 1.484372  | -1.881118 |
| H | 1 | 0.000063  | 0.986953  | -2.840530 |
| C | 6 | -0.000013 | 0.712597  | 1.816191  |
| C | 6 | -0.000021 | 0.718091  | 4.122866  |
| C | 6 | -0.000046 | 1.397211  | 5.358948  |
| H | 1 | -0.000081 | 2.481754  | 5.331860  |
| C | 6 | -0.000024 | 0.700782  | 6.561117  |
| H | 1 | -0.000043 | 1.243570  | 7.501394  |
| N | 7 | -0.000035 | 1.426527  | 2.956135  |
| F | 9 | 0.000057  | 2.889110  | -4.239789 |
| F | 9 | 1.082667  | 4.479230  | -3.225909 |
| F | 9 | 1.082406  | -4.479340 | -3.225918 |
| F | 9 | -1.082406 | 4.479340  | -3.225918 |

Total electronic energy = -1553.44470767

XYZ coordinates of optimized geometry of compound 3\_cation

|   |   |           |           |           |
|---|---|-----------|-----------|-----------|
| C | 6 | -0.000343 | -3.667961 | -3.131291 |
| C | 6 | -0.000223 | -2.878549 | -1.836114 |
| C | 6 | -0.000197 | -3.576825 | -0.625021 |
| H | 1 | -0.000245 | -4.659285 | -0.617340 |
| C | 6 | -0.000113 | -2.865136 | 0.556786  |
| H | 1 | -0.000099 | -3.370857 | 1.512452  |
| C | 6 | -0.000049 | -1.447126 | 0.549967  |
| C | 6 | -0.000048 | -0.736938 | -0.681408 |
| C | 6 | -0.000151 | -1.481495 | -1.861884 |
| H | 1 | -0.000184 | -0.996405 | -2.826753 |
| C | 6 | -0.000009 | -0.730880 | 1.797283  |
| C | 6 | 0.000004  | -0.732870 | 4.085819  |
| C | 6 | 0.000016  | -1.428271 | 5.327226  |
| H | 1 | 0.000028  | -2.510413 | 5.306927  |
| C | 6 | 0.000009  | -0.719739 | 6.494207  |
| H | 1 | 0.000017  | -1.239482 | 7.444753  |
| N | 7 | -0.000004 | -1.416931 | 2.940162  |
| F | 9 | -0.000297 | -2.865317 | -4.208206 |
| F | 9 | -1.085896 | -4.456344 | -3.198896 |
| C | 6 | 0.000343  | 3.667961  | -3.131291 |
| C | 6 | 0.000223  | 2.878549  | -1.836114 |
| C | 6 | 0.000197  | 3.576825  | -0.625021 |
| H | 1 | 0.000245  | 4.659285  | -0.617340 |
| C | 6 | 0.000113  | 2.865136  | 0.556786  |
| H | 1 | 0.000099  | 3.370857  | 1.512452  |
| C | 6 | 0.000049  | 1.447126  | 0.549967  |
| C | 6 | 0.000048  | 0.736938  | -0.681408 |
| C | 6 | 0.000151  | 1.481495  | -1.861884 |



|   |   |           |           |           |
|---|---|-----------|-----------|-----------|
| H | 1 | 0.000184  | 0.996405  | -2.826753 |
| C | 6 | 0.000009  | 0.730880  | 1.797283  |
| C | 6 | -0.000004 | 0.732870  | 4.085819  |
| C | 6 | -0.000016 | 1.428271  | 5.327226  |
| H | 1 | -0.000028 | 2.510413  | 5.306927  |
| C | 6 | -0.000009 | 0.719739  | 6.494207  |
| H | 1 | -0.000017 | 1.239482  | 7.444753  |
| N | 7 | 0.000004  | 1.416931  | 2.940162  |
| F | 9 | 0.000297  | 2.865317  | -4.208206 |
| F | 9 | 1.085896  | 4.456344  | -3.198896 |
| F | 9 | 1.085048  | -4.456562 | -3.198965 |
| F | 9 | -1.085048 | 4.456562  | -3.198965 |

Total electronic energy = -1553.07921207

### References:

1. Y.-C. Chang and I. Chao, *J. Phys. Chem. Lett.*, 2010, **1**, 116-121.
